# Supplementary material for: Absolutely “off–on” fluorescent CD-based nanotheranostics for tumor intracellular real-time imaging and pH-triggered DOX delivery
Source: Royal Society of Chemistry journal article supplement (doi:10.1039/d0tb01596b), 2020-01-01
Supplement: d0tb01596b1.pdf [file d0tb01596b1.pdf]

### Supporting Information

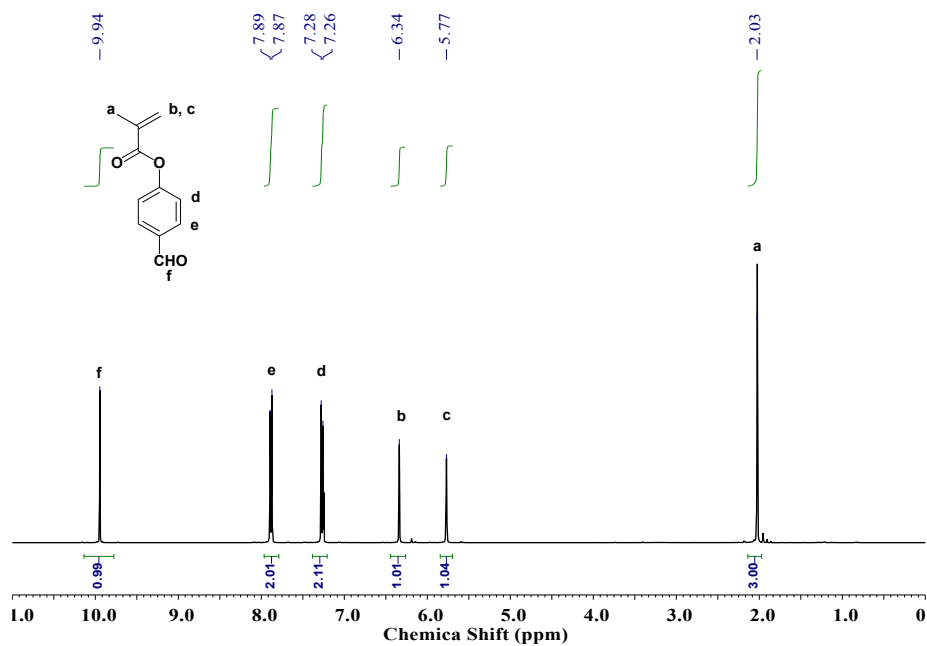

**Fig. S1.**  $^1\text{H}$  NMR spectrum of FPMA in  $\text{CDCl}_3$ .

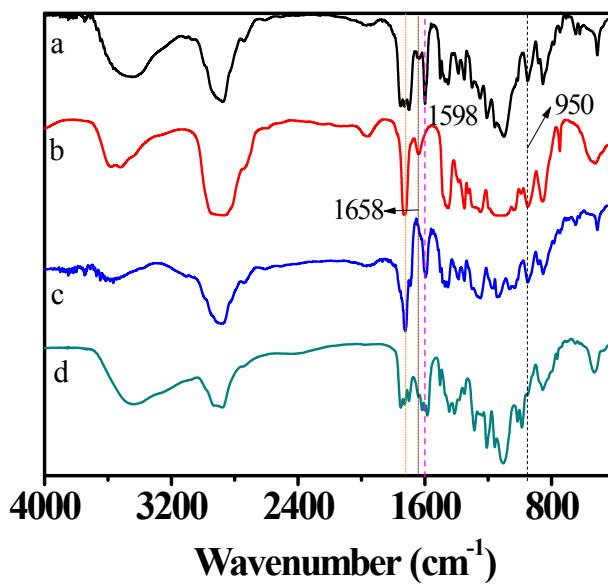

**Fig. S2.** FTIR spectra of (a)  $\text{PPEGMA}_{42}$ , (b)  $\text{PPEGMA}_{42}\text{-}b\text{-PFPMA}_{122}$ , (c)  $\text{PPEGMA}_{42}\text{-}b\text{-PFPMA}_{122}\text{-(CDs)}$  and (d)  $\text{PPEGMA}_{42}\text{-}b\text{-PFPMA}_{122}\text{-(CDs)-DOX}$ .

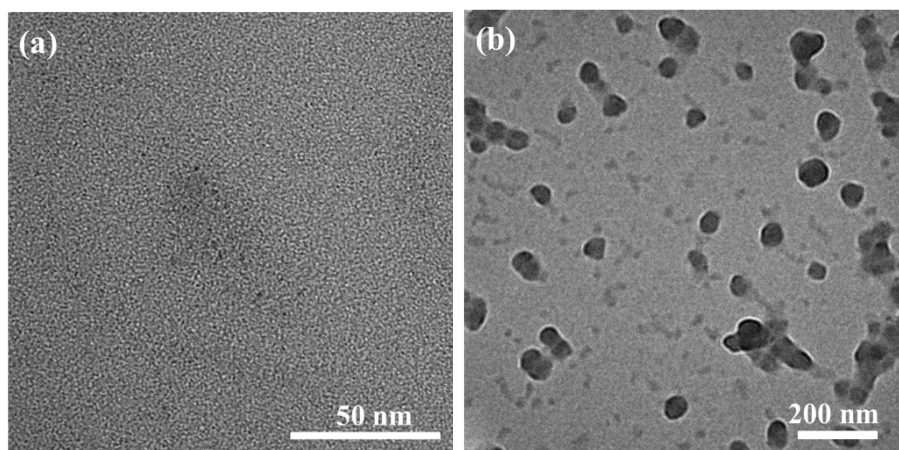

**Fig. S3.** TEM image of the CDs (a) and PPEGMA<sub>42</sub>-*b*-PFPMA<sub>122</sub>-(CDs)-DOX prodrug nanoparticles (b).
